# Supplementary material for: Influence of chemical composition on the proton conductivity of microporous organic polymers entrapped in nitrilotrimethylphosphonic acid
Source: Royal Society of Chemistry journal article supplement (doi:10.1039/d1nj02385c), 2021-01-01
Supplement: d1nj02385c1.pdf [file d1nj02385c1.pdf]

## Supporting Information

### **Influence of Chemical Composition on Proton Conductivity of Microporous Organic Polymers Entrapped in Nitrilotrimethylphosphonic Acid**

Jiarui Du<sup>a</sup>, Feng Zhang<sup>a\*</sup>, Xiaoqiang Liang<sup>b\*</sup>, and Fengyu Qu<sup>a\*</sup>

*a. Key Laboratory of Photochemical Biomaterials and Energy Storage Materials,  
Heilongjiang Province and College of Chemistry and Chemical Engineering, Harbin  
Normal University, Harbin 150025, P. R. China*

*b. College of Environmental and Chemical Engineering, Xi'an Polytechnic  
University, Xi'an 710048, P. R. China*

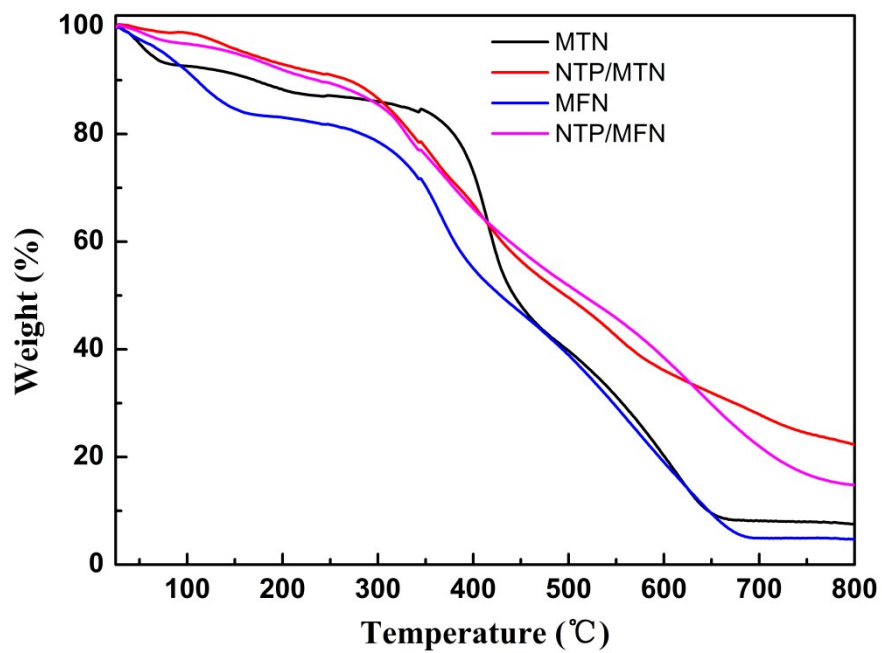

Fig. S1 TGA curves of MTN, MFN, NTP/MTN and NTP/MFN.

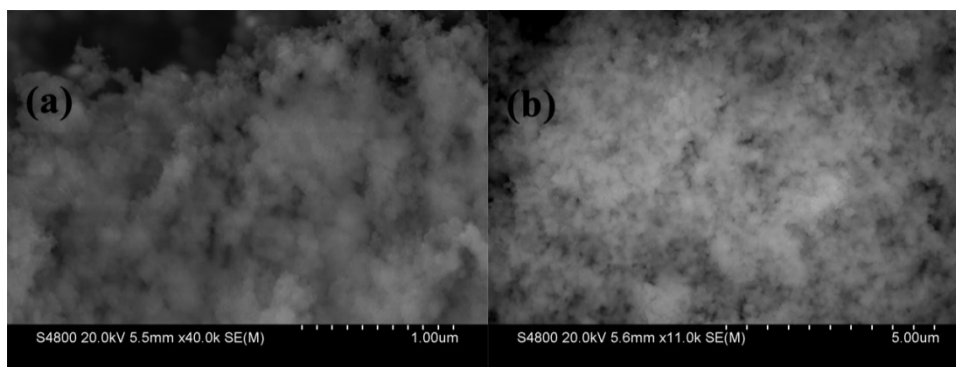

Fig. S2 SEM images of (a) MTN and (b) NTP/MTN.

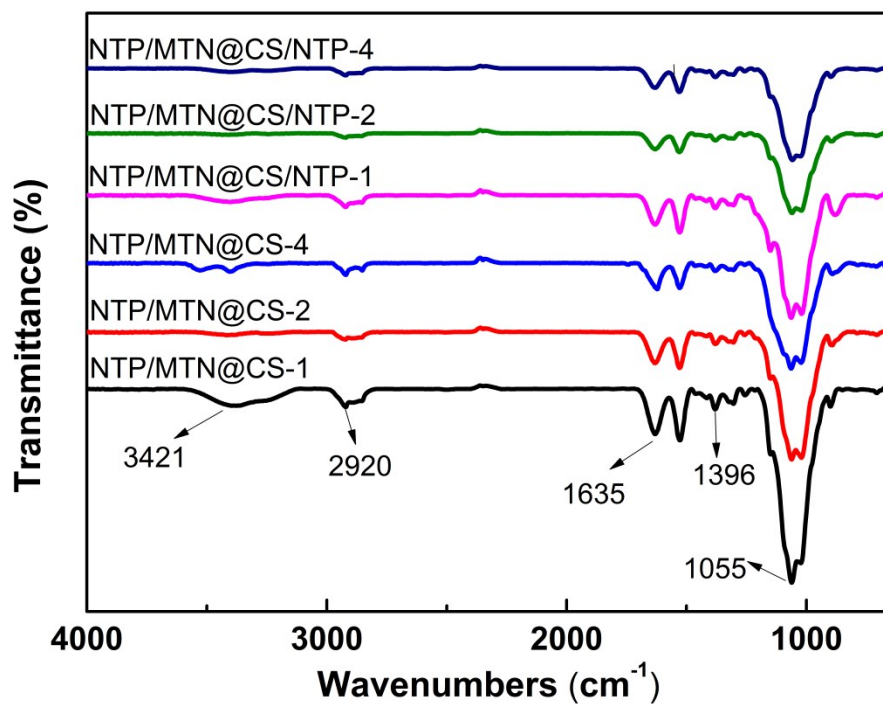

Fig. S3 FT-IR spectra of NTP/MTN membranes.

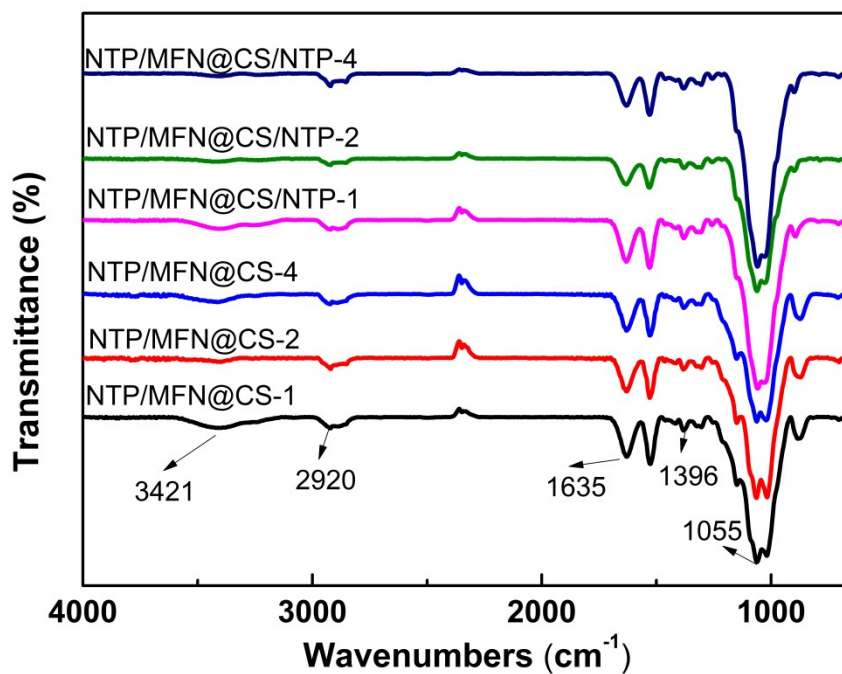

Fig. S4 FT-IR spectra of NTP/MFN membranes.

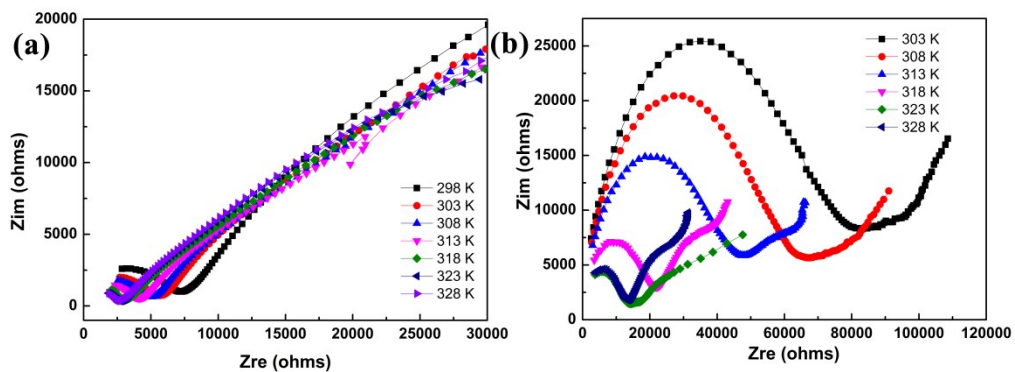

Fig. S5 Nyquist plots of CS membranes at (a) ~98% RH and (b) ~76% RH.

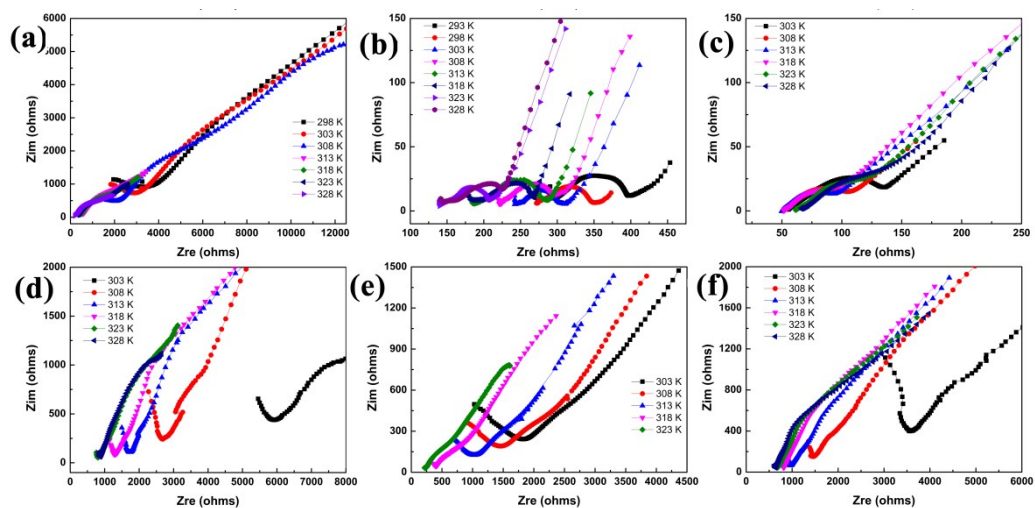

Fig. S6 Nyquist plots of (a) NTP/MFN@CS-1, (b) NTP/MFN@CS-2 and (c) NTP/MFN@CS-4 (d) NTP/MFN@CS/NTP-1, (e) NTP/MFN@CS/NTP-2 and (f) NTP/MFN@CS/NTP-4 at ~98% RH.

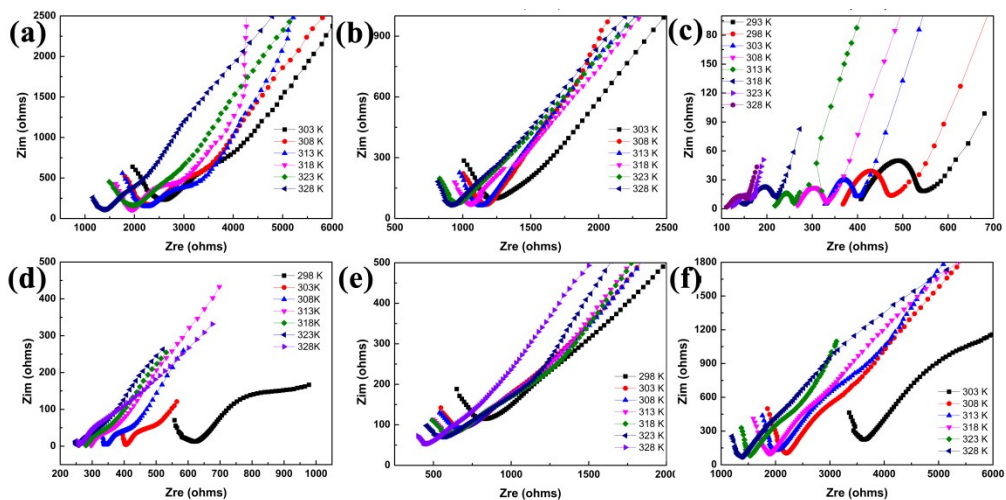

**Fig. S7** Nyquist plots of (a) NTP/MTN@CS-1, (b) NTP/MTN@CS-2 and (c) NTP/MTN@CS-4 (d) NTP/MTN@CS/NTP-1, (e) NTP/MTN@CS/NTP-2 and (f) NTP/MTN@CS/NTP-4 at  $\sim 98\%$  RH.

---

**Table S1** CHN elemental analysis and ICP of MTN, NTP/MTN, MFN and NTP/MFN.

| Samples | C (%) | H (%) | N (%) | S (%) | P (%)  |
|---------|-------|-------|-------|-------|--------|
| MFN     | 33.83 | 4.78  | 46.13 | 0     | 0.0003 |
| NTP/MFN | 28.67 | 4.74  | 33.83 | 0     | 0.085  |
| MTN     | 45.12 | 3.33  | 30.14 | 4.13  | 0.0002 |
| NTP/MTN | 32.44 | 3.35  | 23.62 | 3.01  | 0.083  |

**Table S2** Porosity parameters of MTN, NTP/MTN, MFN and NTP/MFN.

| Samples | S <sub>BET</sub> (cm <sup>2</sup> g <sup>-1</sup> ) | Pore volume (cm <sup>3</sup> g <sup>-1</sup> ) |
|---------|-----------------------------------------------------|------------------------------------------------|
| MFN     | 230.07                                              | 0.38                                           |
| NTP/MFN | 42.33                                               | 0.11                                           |
| MTN     | 785.09                                              | 1.13                                           |
| NTP/MTN | 185.07                                              | 0.69                                           |

**Table S3** Ionic-exchange capability (IEC) and activation energy ( $E_a$ ) of membranes.

| Sample           | IEC (meq g <sup>-1</sup> ) | $E_a$ (eV) | $\sigma$ (S cm <sup>-1</sup> ) |
|------------------|----------------------------|------------|--------------------------------|
| MFN              | 0.15                       | /          | /                              |
| NTP/MFN          | 6.58                       | /          | /                              |
| MTN              | 0.045                      | /          | /                              |
| NTP/MTN          | 5.78                       | /          | /                              |
| NTP/MFN@CS-1     | 3.20                       | 0.88       | $1.9 \times 10^{-2}$           |
| NTP/MFN@CS-2     | 4.40                       | 0.83       | $4.6 \times 10^{-2}$           |
| NTP/MFN@CS-4     | 3.14                       | 0.20       | $5.5 \times 10^{-3}$           |
| NTP/MFN@CS/NTP-1 | 0.53                       | 0.70       | $9.1 \times 10^{-4}$           |
| NTP/MFN@CS/NTP-2 | 0.25                       | 0.98       | $3.4 \times 10^{-3}$           |
| NTP/MFN@CS/NTP-4 | 0.32                       | 0.58       | $5.3 \times 10^{-4}$           |
| NTP/MTN@CS-1     | 1.19                       | 0.21       | $1.1 \times 10^{-3}$           |
| NTP/MTN@CS-2     | 1.25                       | 0.14       | $1.3 \times 10^{-3}$           |
| NTP/MTN@CS-4     | 0.95                       | 0.35       | $3.4 \times 10^{-3}$           |
| NTP/MTN@CS/NTP-1 | 1.19                       | 0.21       | $9.2 \times 10^{-3}$           |
| NTP/MTN@CS/NTP-2 | 0.56                       | 0.18       | $1.1 \times 10^{-3}$           |
| NTP/MTN@CS/NTP-4 | 0.34                       | 0.48       | $3.8 \times 10^{-4}$           |
| CS               | 0.20                       | 0.32       | $1.1 \times 10^{-4}$           |

**Table S4** Proton conductivity of COF and membranes under ambient conditions.

| Materials                                                                                      | Condition       | $\sigma/S \text{ cm}^{-1}$ | Reference |
|------------------------------------------------------------------------------------------------|-----------------|----------------------------|-----------|
| I                                                                                              | 55 °C, 99% RH   | $6.17 \times 10^{-2}$      | [1]       |
| SZrTi                                                                                          | 90°C, 100% RH   | $2.9 \times 10^{-3}$       | [2]       |
| Fe-NH <sub>3</sub> -72h                                                                        | 80 °C, 95% RH   | $1.8 \times 10^{-3}$       | [3]       |
| c-PBI-30                                                                                       | 200 °C, 100% RH | $2.53 \times 10^{-1}$      | [4]       |
| FJU-80                                                                                         | 80 °C, 98% RH   | $1.05 \times 10^{-4}$      | [5]       |
| COF-1-Li                                                                                       | 40 °C, 98% RH   | $2.7 \times 10^{-2}$       | [6]       |
| COF-1-Na                                                                                       | 40 °C, 98% RH   | $2.5 \times 10^{-2}$       | [6]       |
| NH <sub>4</sub> PO <sub>3</sub> /MO <sub>2</sub>                                               | 175 °C, 99% RH  | $8.5 \times 10^{-3}$       | [7]       |
| BaCe <sub>(0.85-x)</sub> Co <sub>x</sub> Gd <sub>0.15</sub> O <sub>3-<math>\delta</math></sub> | 200 °C, 99% RH  | $4.81 \times 10^{-3}$      | [8]       |
| Nafion/BP3-1.0                                                                                 | 50 °C, 80% RH   | $8.5 \times 10^{-2}$       | [9]       |
| SPS/POM-BC-30                                                                                  | 25 °C, 100% RH  | $5.3 \times 10^{-2}$       | [10]      |
| FJU-106                                                                                        | 70 °C, 99% RH   | $1.8 \times 10^{-2}$       | [11]      |
| h-BN                                                                                           | 55 °C, 99% RH   | $6.17 \times 10^{-2}$      | [12]      |
| Am3-sNCC-5                                                                                     | 40 °C, 100% RH  | $4.3 \times 10^{-2}$       | [13]      |
| NUS-10(R)@PVDF-50                                                                              | 25 °C, 100% RH  | $5.16 \times 10^{-3}$      | [14]      |
| NTP/MFN@CS-2                                                                                   | 50 °C, 98% RH   | $4.6 \times 10^{-2}$       | This work |

**Reference**

- [1] S. Thammakan, P. Rodlamul, N. Semakul, N. Yoshinari, A. Rujiwatra, *Inorg. Chem.*, 2020, **6**(59), 3518–3522.
- [2] S. Sarirchi, S. Rowshanzamir, F. Mehri, *Int. J. Energy Res.*, 2020, **44**(4) 2783-2800.
- [3] I.R. Salcedo, M. García, A. Cuesta, E.R. Losilla, A. Díaz, *Dalton Trans.*, 2020, **49**, 3981-3988.
- [4] X. Li, H. Ma, P. Wang, Z. Liu, M.D. Guiver, *Chem. Mater.*, 2020, **3**(32), 1182–1191.
- [5] Z. Que, Y. Ye, Y. Yang, F. Xiang, Z. Zhang, *Inorg. Chem.*, 2020, **5**(59),



---

3053–3061.

[6] B. Zhou, J. B. Le, Z. Cheng, X. Zhao, H. Chen, *ACS Appl. Mater. Interfaces*, 2020, **12**(7), 8198-8205.

[7] C. Sun, U. Stimming, *Electrochim. Acta*, 2008, **53**, 6417-6422.

[8] G. Accardo, D. Frattini, S.P. Yoon, *J. Alloys Compd*, 2020, **834**, 155114.

[9] F.C. Teixeira, A.I.d. Sá, A.P.S. Teixeira, V.M. Ortiz-Martínez, C.M. Rangel, *Int. J. Hydrogen Energy*, 2020, **45**(31) 15495-15506.

[10] Y. Yin, H. Li, H. Wu, W. Wang, Z. Jiang, *Int. J. Hydrogen Energy*, 2020, **232**, 58-67.

[11] Q. Lin, Y. Ye, L. Liu, Z. Yao, Z. Li, L. Wang, C. Liu, Z. Zhang, S. Xiang, *Nano Res.*, 2020, **14**, 387–391.

[12] S.I. Yoon, K.Y. Ma, T.Y. Kim, H.S. Shin, *J. Mater. Chem.*, 2020, **8**, 2898-2912.

[13] Q. Zhao, Y. Wei, C. Ni, L. Wang, *Appl. Surf. Sci.*, 2019, **466**, 691-702.

[14] Y. Peng, G. Xu, Z. Hu, Y. Cheng, C. Chi, D. Yuan, H. Cheng and D. Zhao, *ACS Appl. Mater. Interfaces*, 2016, **8**, 18505-18512.
